# Supplementary material for: Metastatic group 3 medulloblastoma is driven by PRUNE1 targeting NME1–TGF-β–OTX2–SNAIL via PTEN inhibition
Source: Oxford University Press journal article supplement (doi:10.1093/brain/awy039), 2018-02-02
Supplement: awy039_brain-2017-01440-file010.pdf [file awy039_brain-2017-01440-file010.pdf]

**A**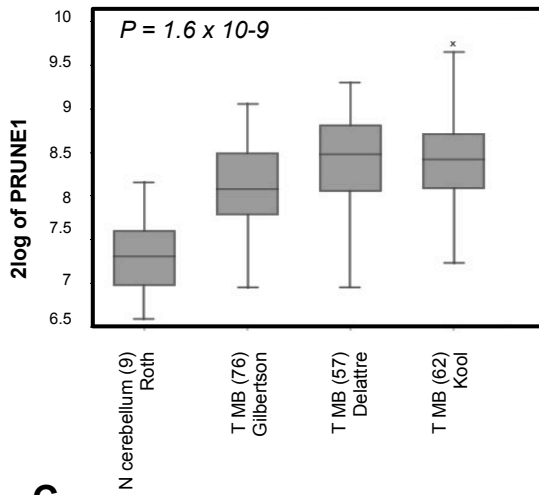**B**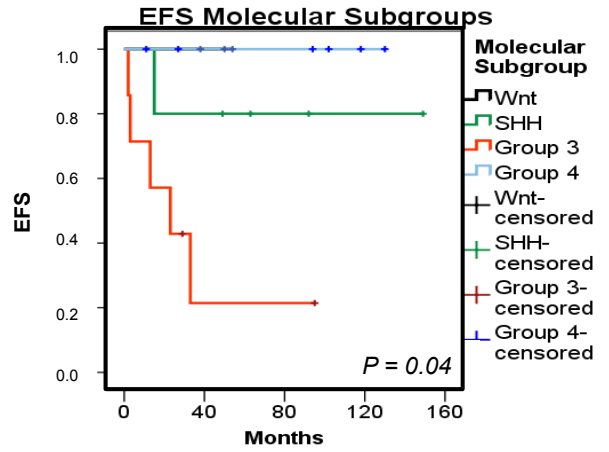**C**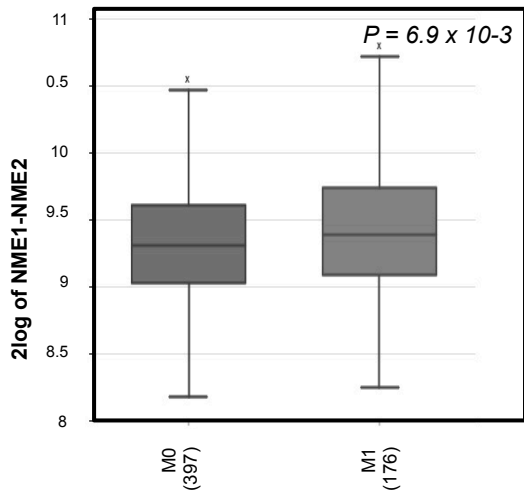**D**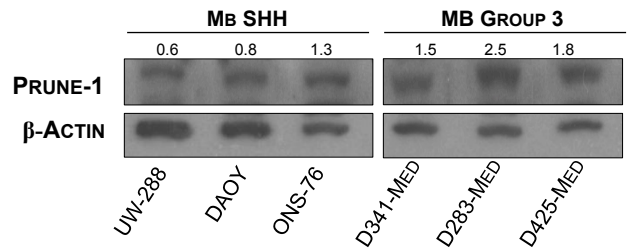**E**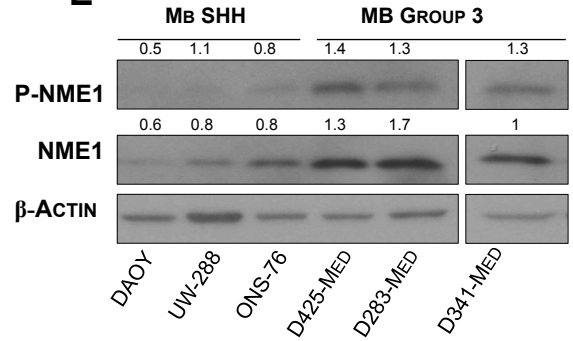**F**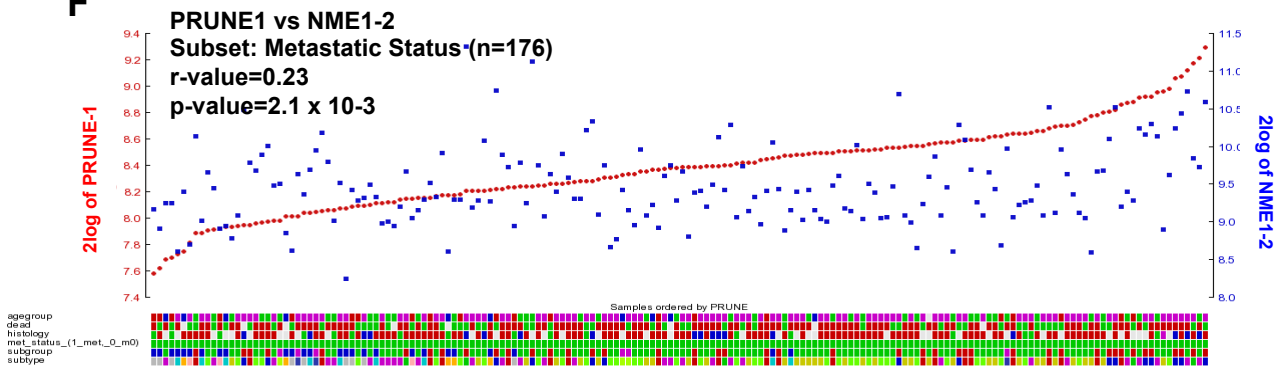

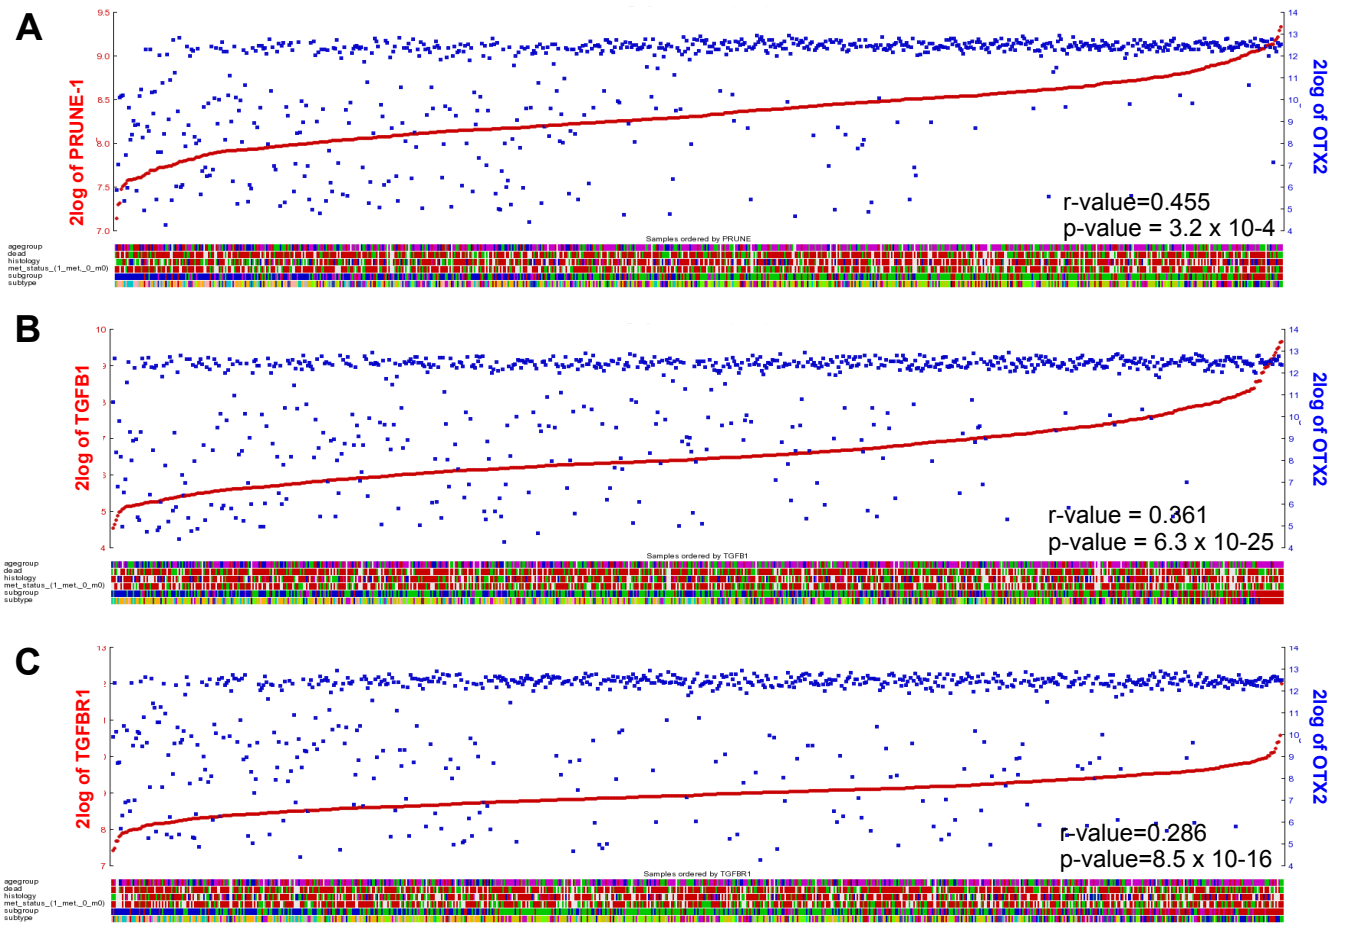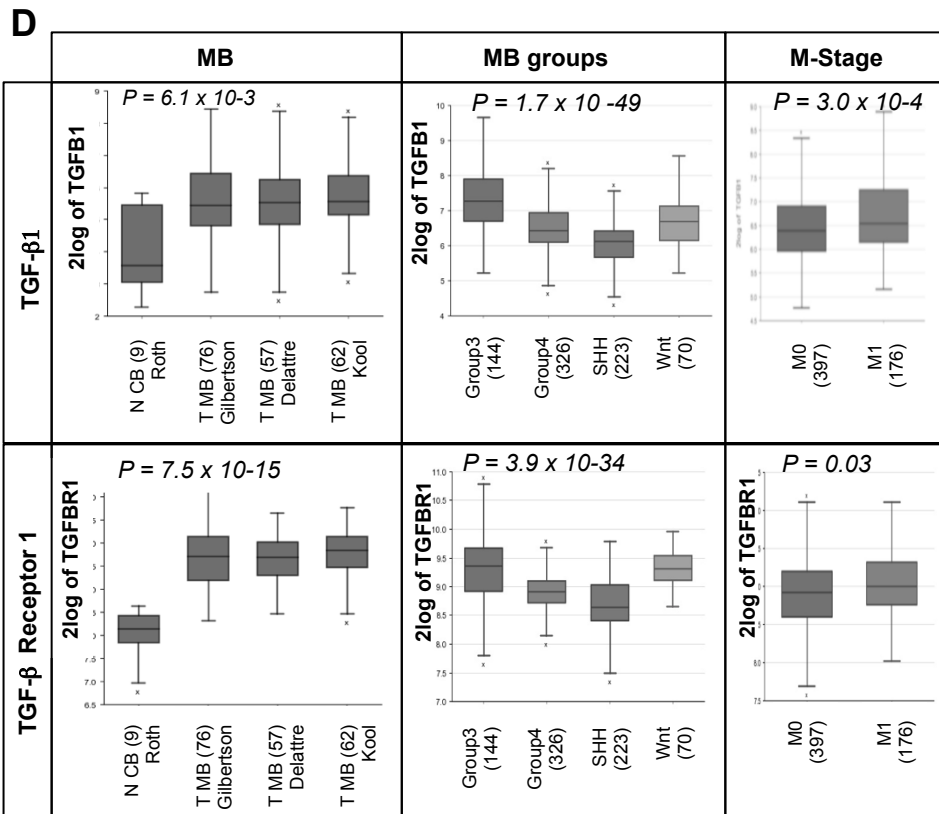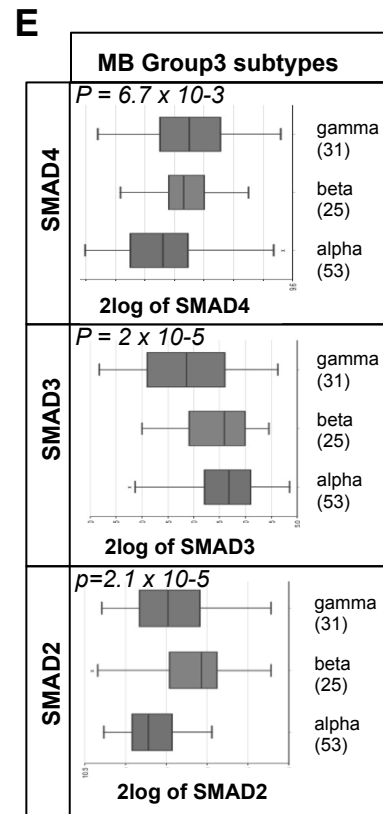

Figure S2

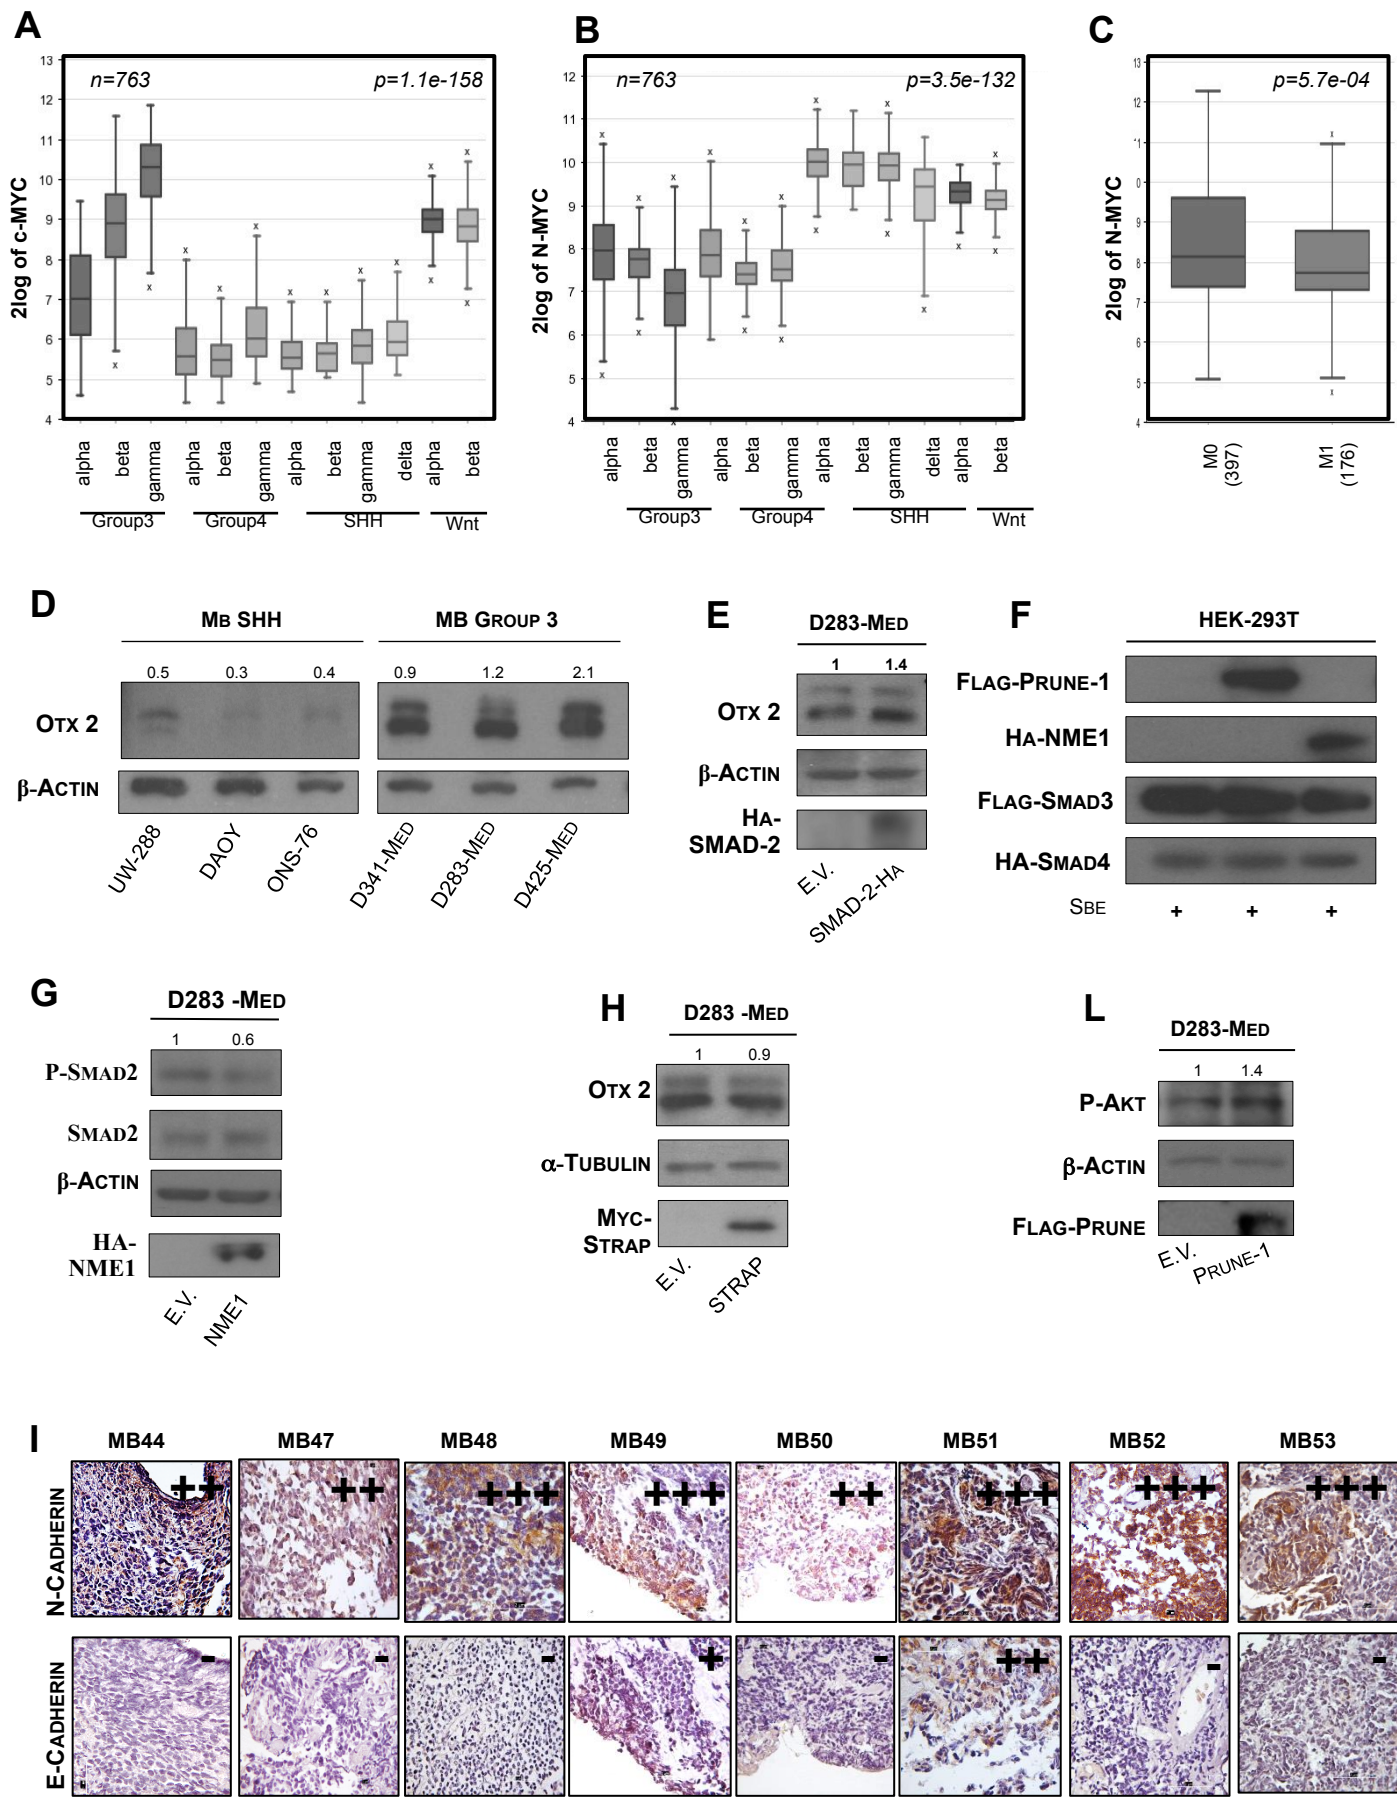

Figure S3



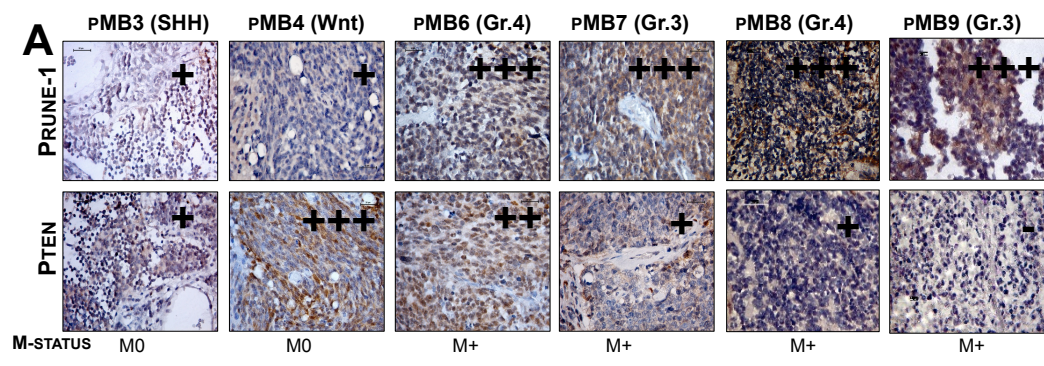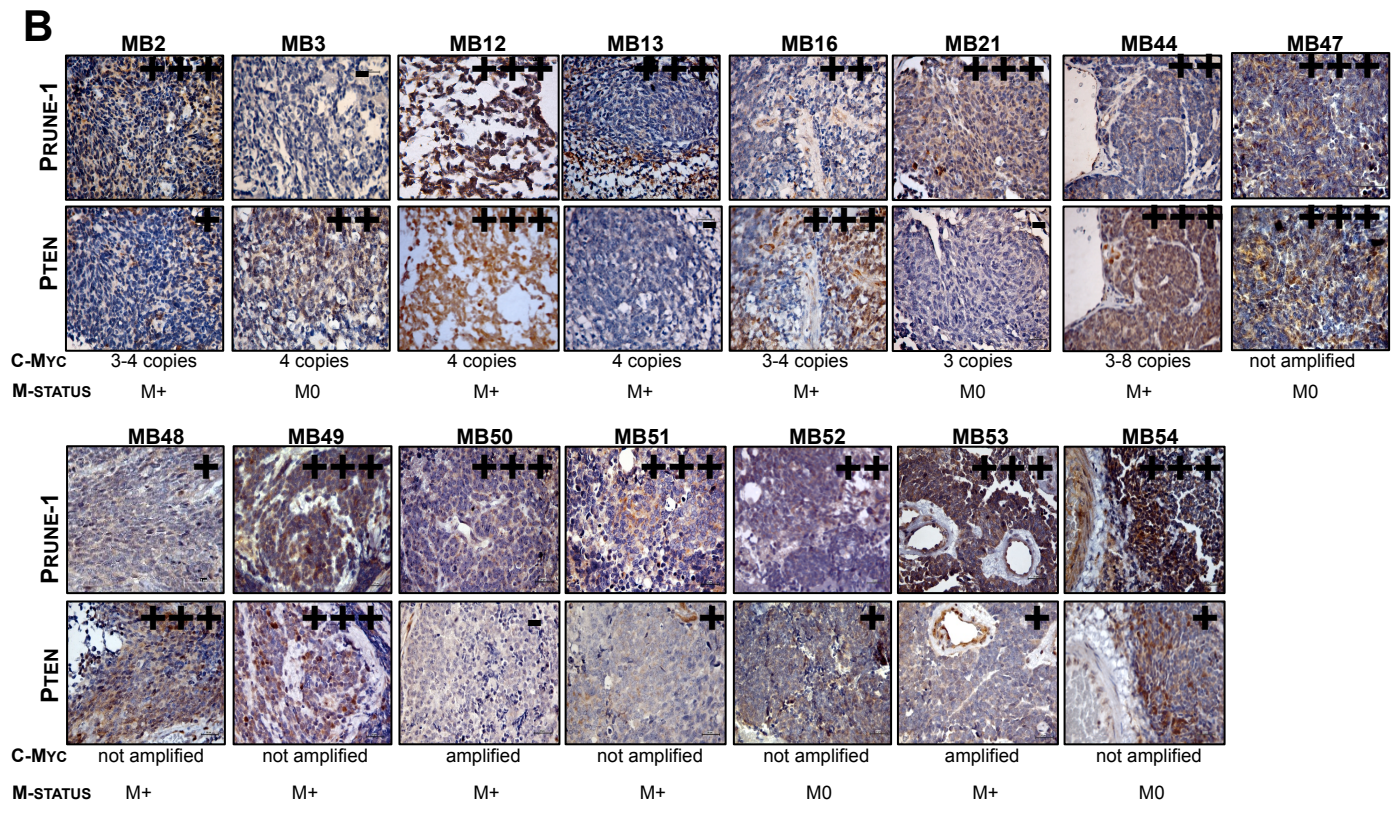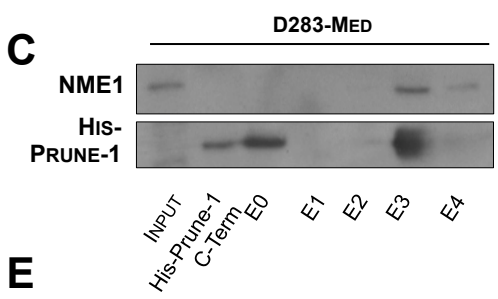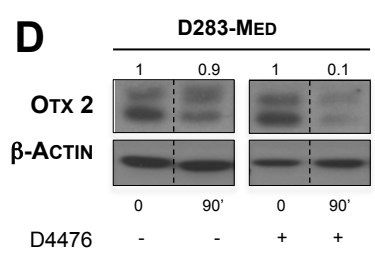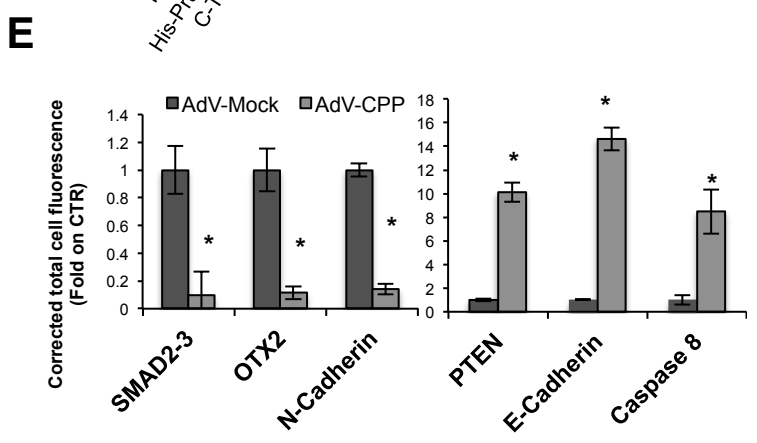

Figure S4



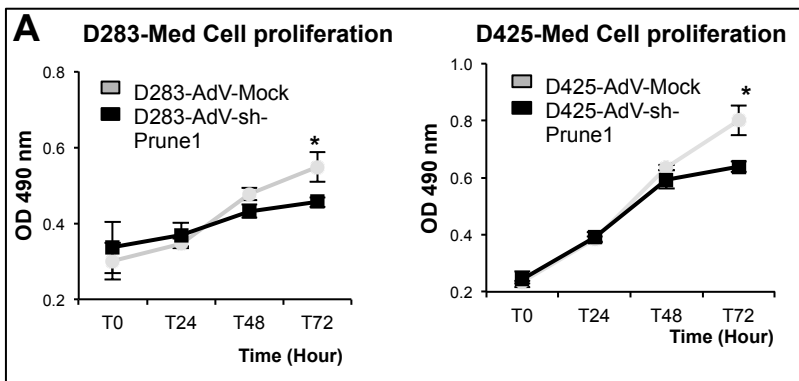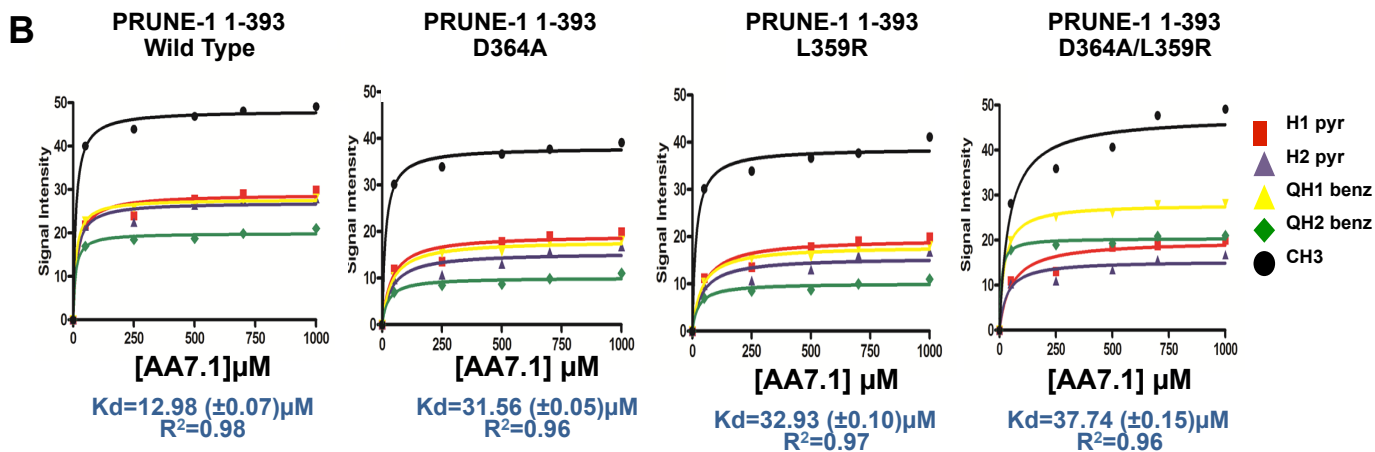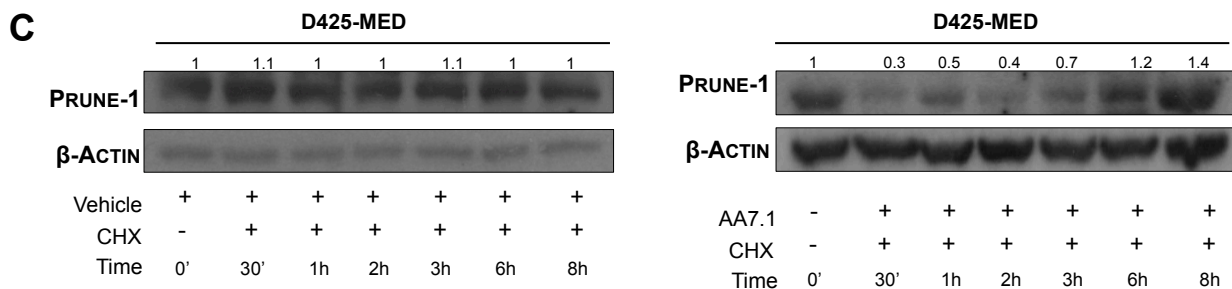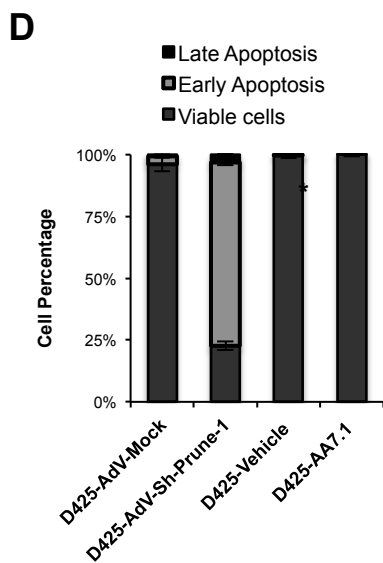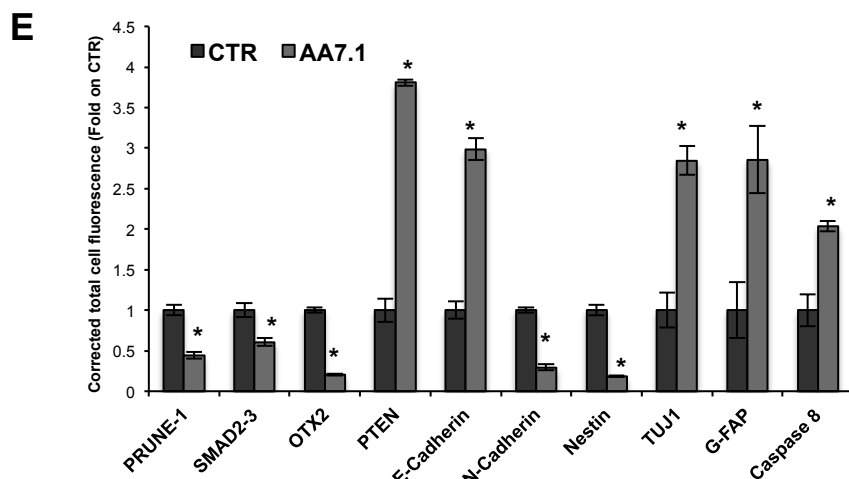

**Figure S5**

**Figure 4C . Imaging Mice Scale Acquisitions**

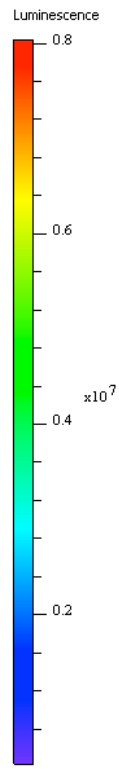

Radiance  
(p/sec/cm<sup>2</sup>/sr)

Color Scale  
Min = 4.36e5  
Max = 8.04e6

**Figure 6A . Imaging Mice Scale Acquisitions**

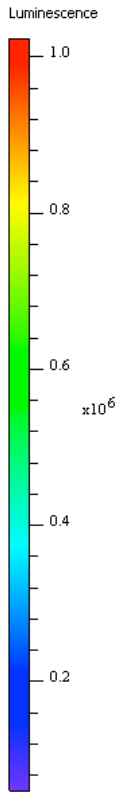

Radiance  
(p/sec/cm<sup>2</sup>/sr)

Color Scale  
Min = 6.07e4  
Max = 1.02e6
